# Supplementary material for: On the adsorption mechanism of caffeine on MAPbI3 perovskite surfaces: a combined UMC-DFT study
Source: Royal Society of Chemistry journal article supplement (doi:10.1039/d0cp04308g), 2021-01-01
Supplement: d0cp04308g1.pdf [file d0cp04308g1.pdf]

## Supplementary Information for On the Adsorption Mechanism of Caffeine on MAPbI<sub>3</sub> Perovskite Surfaces: A Combined UMC–DFT Study

Luiz A. Ribeiro Junior,<sup>1</sup> Raphael M. Tromer,<sup>2</sup> Ramiro M. dos Santos,<sup>1</sup> and Douglas S. Galvão<sup>2</sup>

<sup>1</sup>*Institute of Physics, University of Brasília, 70.919-970, Brasília, Brazil.*

<sup>2</sup>*Applied Physics Department, University of Campinas, Campinas, São Paulo, Brazil.*

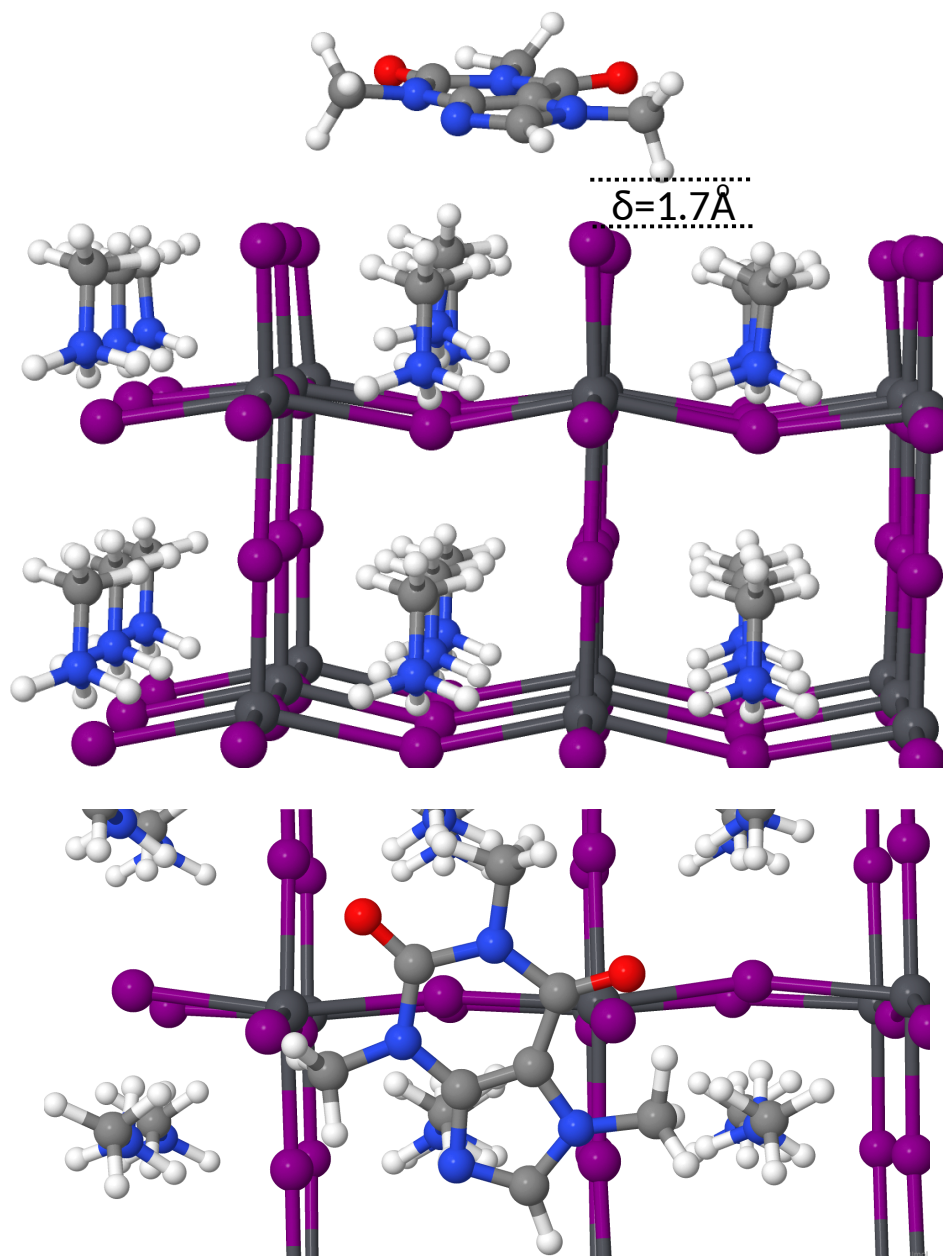

FIG. S1. DFT ground state configuration for the Methyl-ammonium covered PbI<sub>3</sub> perovskite. The caffeine/MAPbI<sub>3</sub> adsorption energy is  $E_0 = -1.14$  eV. A Mulliken charge of  $-0.334e$  is transferred from caffeine to MAPbI<sub>3</sub> perovskite.  $\delta$  denotes the distance between the caffeine molecule and the perovskite surface.

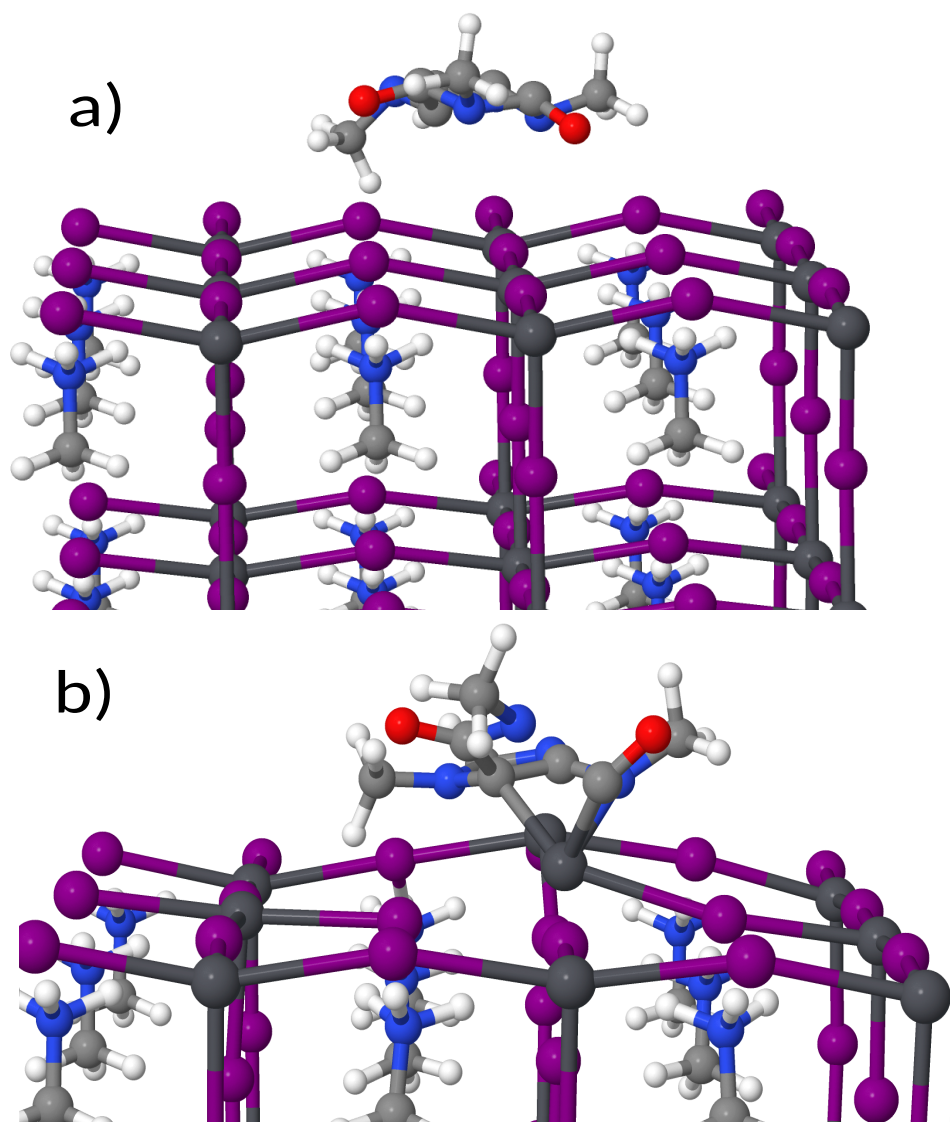

FIG. S2. Pb covered PbI<sub>3</sub> perovskite interaction with a caffeine molecule: a) input structure and b) obtained DFT ground state configuration.

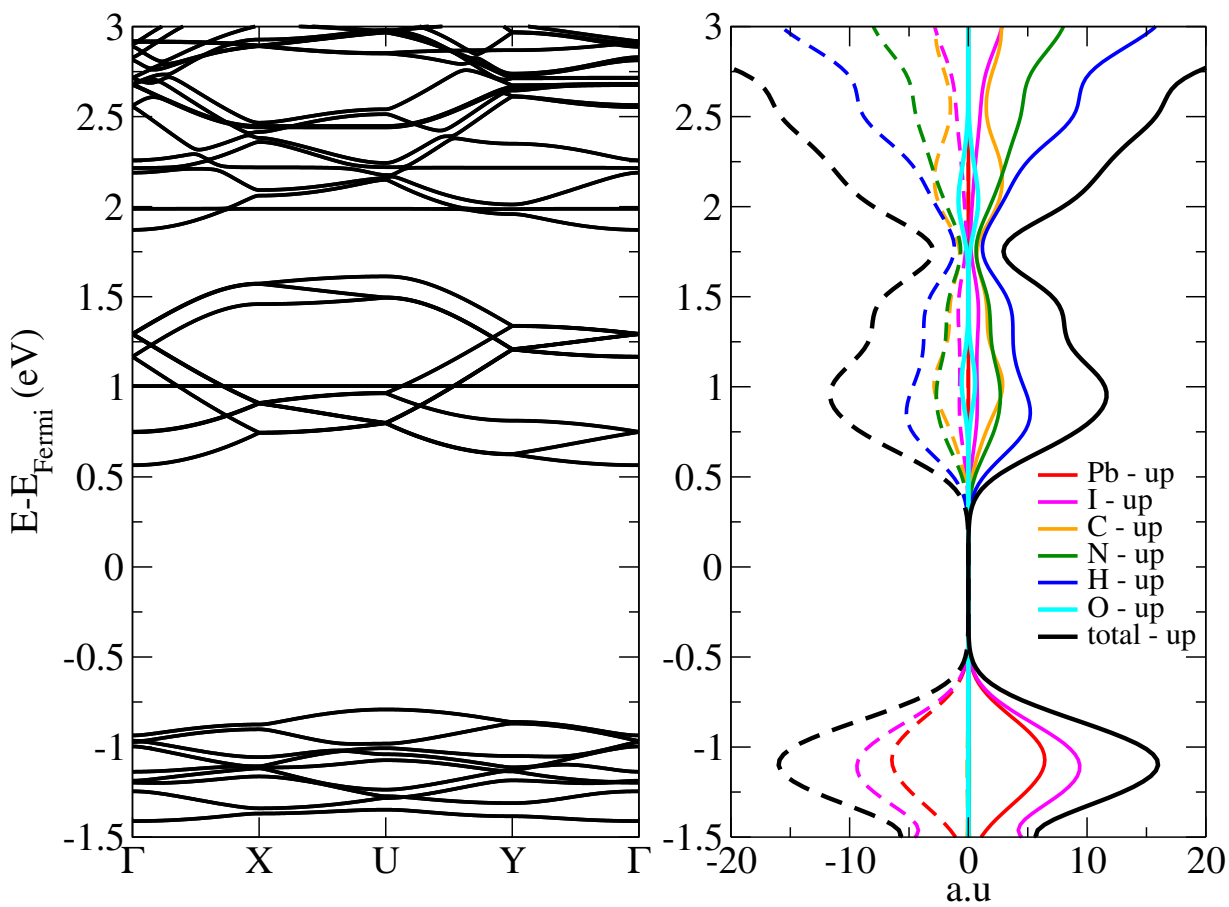

FIG. S3. From left to right: electronic band structure and the corresponding projected density of states (PDOS) for the MA covered  $\text{MAPbI}_3$ /caffeine system presented in Figure S1.
